# Supplementary material for: Deuteration-enhanced neutron contrasts to probe amorphous domain sizes in organic photovoltaic bulk heterojunction films
Source: PubMed Central journal article supplement (PMC10981694; doi:10.1038/s41467-024-47052-7), 2024-03-30
Supplement: 41467_2024_47052_MOESM2_ESM.pdf [file 41467_2024_47052_MOESM2_ESM.pdf]

## Peer Review File

---

Deuteration-enhanced neutron contrasts to probe amorphous domain sizes in organic photovoltaic bulk heterojunction films

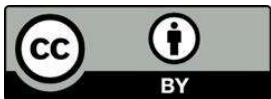

**Open Access** This file is licensed under a Creative Commons Attribution 4.0

International License, which permits use, sharing, adaptation, distribution and reproduction in any medium or format, as long as you give appropriate credit to

the original author(s) and the source, provide a link to the Creative Commons license, and indicate if changes were made. In the cases where the authors are anonymous, such as is the case for the reports of anonymous peer reviewers, author attribution should be to 'Anonymous Referee' followed by a clear attribution to the source work. The images or other third party material in this file are included in the article's Creative Commons license, unless indicated otherwise in a credit line to the material. If material is not included in the article's Creative Commons license and your intended use is not permitted by statutory regulation or exceeds the permitted use, you will need to obtain permission directly from the copyright holder. To view a copy of this license, visit <http://creativecommons.org/licenses/by/4.0/>.

## REVIEWER COMMENTS

### Reviewer #1 (Remarks to the Author):

Cai et. al. used isotope labeling method to measure the amorphous domain size of deuterated Y6 molecules in the blend film of PM6:d-Y6 and experimentally uncovered a structure-property relationship between the short-range aggregation of Y6 molecules and the performance of OPV devices. The authors combined GISAXS and GISANS techniques to evaluate the scattering length densities of polymeric donors and acceptors, which give a large contrast to distinguish the aggregation of acceptors. Although GISANS has been widely utilized in OPV studies (refs. 28-33), the aggregation nature of Y6 in amorphous domains is significant to understanding the role of Y6, as an emerging acceptor, in the development of high-performance solar cells. Thus, I recommend this work to publish in nature communication after the response to the following comments:

- 1) All the data in this manuscript are obtained by GISAXS and GISANS. Although these two techniques are powerful to support the conclusion, would the authors additionally provide AFM phase images to observe and evaluate the phase separation of PM6:d-Y6? To do so, the crystalline and amorphous domain sizes could be measured directly.
- 2) The authors fitted the GISAXS and GISANS intensity profile using equation 1, and provided the information of nanomorphology in PM6:d-Y6 film. In line 226-227, they claim that GISAXS profile gave “the correlation length ( $\xi$ ) of the amorphous intermixing phase and the size of the crystalline acceptor domain.” In my opinions, both the PM6 and d-Y6 are crystalline in the blend films, so why only crystalline domain of Y6 acceptor can be evaluated by fitting the equation?
- 3) Would the authors explain the reason to choose a PM6:Y6 BHJ blend as the active layers in OPV devices instead of PM6:d-Y6? Since all the information on the nanomorphology of blend films comes from PM6:d-Y6, the corresponding devices are better to be tested for data consistency, although the performance of two devices comprising PM6:Y6 and PM6:d-Y6 may be identical (as shown in Fig. S8b)

Others:

- 4) line 57, the “research” should be plural so “has” is used wrongly in grammar.
- 5) line 91, the “challenghg” is a typo.
- 6) line 103, “not” in the term of “it originates not from crystalline phases...” is inappropriately expressed in grammar.
- 7) line 129, the “aggregation” should be singular.
- 8) line 137, “Supplementary Fig. 6” should be “Supplementary Fig. 7”.
- 9) line 202, the correspondence of fig. 3a and 3b to GISANS and GISAXS is an error.

Reviewer #2 (Remarks to the Author):

The main novelty of this work is that the authors deuterated the non-fullerene acceptor (NFA) Y6 to overcome the lack of neutron contrast in OPV films based on NFAs. This allowed them to study the nanomorphology of the OPV films using GISANS. This work is merely incremental, and it lacks the originality needed to be published in this journal.

In the abstract the authors say that their work uncovers "for the first time" the amorphous nanomorphology of OPV films. This is not correct – this has been addressed before either using neutron scattering or Resonant Soft X-ray Scattering (RSoXS) techniques.

Neutron scattering (SANS and Neutron reflectivity) have been previously used extensively to study fullerene-based OPVs and the authors are advised to improve their literature survey and include some important references that are missing. For example, these below among many others.

Wienhold, K.S., "Organic solar cells probed with advanced neutron scattering techniques" Applied Physics Letters, 116, 120504 (2020)

Zhang, Y. et al, "Understanding and controlling morphology evolution via DIO plasticization in PffBT4T-2OD/PC71BM devices", Scientific Reports 7, 44269 (2017)

Chen D. "P3HT/PCBM Bulk Heterojunction Organic Photovoltaics: Correlating Efficiency and Morphology", Nano Lett. 2011, 11, 2, 561–567

Bernardo, G. et al "Impact of 1,8-diiodooctane on the morphology of organic photovoltaic (OPV) devices – A Small Angle Neutron Scattering (SANS) study", Polymer Testing 82 (2020) 106305

Reviewer #3 (Remarks to the Author):

The authors used a combination of neutron scattering - in terms of GISANS technique - and deuteration to probe the nanomorphology of the PM6:d-Y6 blend film. The deuteration was selectively done for the NFA Y6 (d-Y6). The measurements were underpinned by MD calculations. The study highlighted a specific short-range aggregation of Y6 - as an intrinsic feature of this NFA, that was concluded to be a key contributor to the high photovoltaic performance of most Y6-containing organic bulk heterojunction systems. Indeed, the authors studied other polymers than PM6, and have supported the neutron data by measurements using different x-ray and light-based techniques.

The manuscript is dense, organized and well written. The topic, techniques and findings warrant publication in Nature Communications after considering the following comment.

The only concern readers, who might be interested in applying neutron scattering and associated deuteration in their research on OPVs, would be to have some more targeted references on the application of neutron scattering and deuteration to study morphology and local properties, including

dynamics, beyond GISANS by including other neutron-based techniques. In this context, the authors are invited to enrich the introduction and the reference list by considering recent works on binary and ternary blend, either with acceptors being fullerenes (PCBM, etc) or NFAs (O-IDTBR, etc).

Reviewer #4 (Remarks to the Author):

Deuteration-enhanced neutron is cleverly applied to GISANS test, and the unique short-range aggregation behavior of Y6 in the D/A blending region is effectively detected, which also confirms the experimental results of other research groups. Prof Lu and co-workers provide a novel method for detecting the aggregate state of non-crystalline domain in active layer of OSCs. However, SANS is already a conventional and mature characterization technique, and deuterated materials have also been applied to SANS. In addition, the PM6:Y6 device in the paper is a very conventional, although the authors claim that directionally deuterated SANS technology offers opportunities for complex active layer systems and intermolecular interaction mechanisms. The innovation of this article is insufficient. The authors did not validate the proposed large short-range aggregation of acceptors in the D/A blend region as a key to recent high-performance organic solar cells and provide insights for improving the efficiency or stability of organic solar cells, so it is not recommended for publication in Nature Communication.

1. Prof. Ye has demonstrated that deuterated solvents can improve the performance of organic solar cells (Aggregate 2023, 4, e289). d-Y6 shows similar photoelectric properties to Y6 and does not affect the morphology of the active layer. When blended with PM6 to make a device, how does the performance of d-Y6 compare to that of Y6?
2. To understand the formation mechanism of Y6 or d-Y6 aggregates, the single crystal packing is more solid result compared to molecular dynamics simulation. The single crystal of d-Y6 need to be provided.
3. The use of deuterated materials is costly and does not improve efficiency, has little application and is too costly, so the significance of this study is yet to be determined.
4.  $\xi$  in line 310 is in difference from in Table 1. Please check it.
5. The scattering lengths of hydrogen and deuterium have opposite symbols, which allows SANS to use this contrast advantage to selectively label different parts of the study target system. Whether hydrogen in PM6 and deuterium in Y6 can be detected to more deeply interpret the molecular state in the amorphous domain ?
6. The author has proved that short-range aggregation behavior is unique to Y6. Whether other high-performance Y-series acceptors have similar behavior? The authors need to extend the corresponding experiment for d-L8-BO and d-BO-4Cl to support their conclusion.
7. The  $^{13}\text{C}$  NMR and elemental analysis of new compounds need to be provided.

1 **Responses to comments from reviewers**

2 We would like to thank the reviewers and the editor for their valuable time and  
3 comments, which have greatly helped to improve the quality of our paper. We have  
4 addressed the comments from each reviewer point by point and revised the manuscript  
5 accordingly. Our detailed responses are shown in blue and the corresponding revisions  
6 in both the manuscript and supplementary information are indicated with yellow  
7 highlights.

8

9 **Reviewer #1:**

10 Comments:

11 Reviewer #1 (Remarks to the Author):

12 Cai et. al. used isotope labeling method to measure the amorphous domain size of  
13 deuterated Y6 molecules in the blend film of PM6:d-Y6 and experimentally uncovered  
14 a structure-property relationship between the short-range aggregation of Y6 molecules  
15 and the performance of OPV devices. The authors combined GISAXS and GISANS  
16 techniques to evaluate the scattering length densities of polymeric donors and  
17 acceptors, which give a large contrast to distinguish the aggregation of acceptors.  
18 Although GISANS has been widely utilized in OPV studies (refs. 28-33), the  
19 aggregation nature of Y6 in amorphous domains is significant to understanding the role  
20 of Y6, as an emerging acceptor, in the development of high-performance solar cells.  
21 Thus, I recommend this work to publish in nature communication after the response to  
22 the following comments:

23 **Reply:** We thank the reviewer for the overall positive comments.

24

25 1) All the data in this manuscript are obtained by GISAXS and GISANS. Although  
26 these two techniques are powerful to support the conclusion, would the authors  
27 additionally provide AFM phase images to observe and evaluate the phase separation  
28 of PM6: d-Y6? To do so, the crystalline and amorphous domain sizes could be measured

29 directly.

30 **Reply:** We thank the reviewer for this constructive comment. To complement our  
31 scattering measurements, we measured tapping-mode AFM topography images for  
32 PM6:Y6 and PM6:*d*-Y6 blend films processed under three different conditions (as-cast,  
33 CF-opt, and CB-opt, as mentioned in the main text). AFM images of PM6:Y6 blend  
34 films are similar to those of PM6:*d*-Y6 under each processing condition. The root-  
35 mean-square (RMS) roughness of blend films increases from as-cast to CF-opt, and  
36 then to CB-opt, indicating the enhanced molecular aggregation/crystallization induced  
37 by prolonged film drying times. Since topography images partially reflect phase-  
38 separated structures in blend films, we observed spherical agglomeration in CB-opt  
39 films with sizes of tens of nm, consistent with the GISAXS fitting results presented in  
40 the main text. However, we note that the short-range Y6 aggregates probed using  
41 GISANS cannot be identified from AFM images as their sizes (5-10 nm) are below the  
42 resolution of the tip we used (Tap300Al-G, Budget Sensor), which is around 10 nm.  
43 We added the AFM topography images to **Supplementary Fig. 20**.

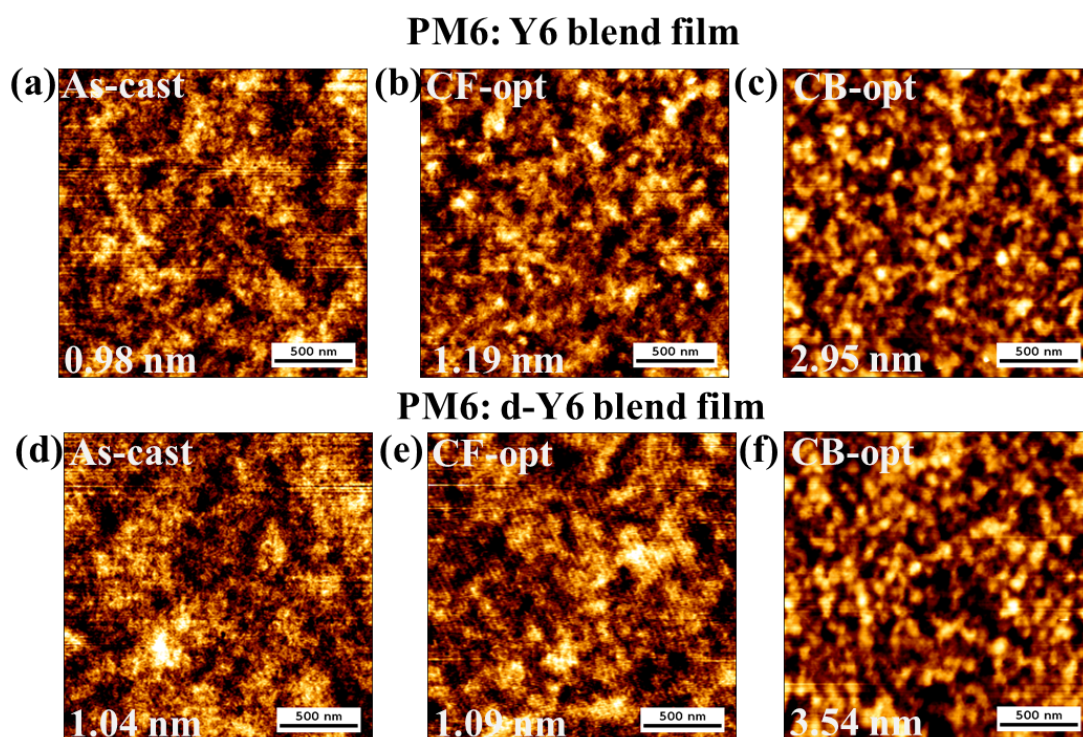

44

45 **Supplementary Fig. 20** AFM topography images of PM6:Y6 (a-c) and PM6: *d*-Y6 (d-

46 f) blend films processed under different conditions mentioned in the main text. The  
47 root-mean-square (RMS) roughness of heights is labelled at the inset for each image.

48

49 We added the following sentences to line 293, page 16 of the main text.

50

51 Tapping-mode atomic-force microscopy (AFM) was also applied to measure the  
52 surface topography of PM6:Y6 and PM6:*d*-Y6 films processed under the three  
53 aforementioned conditions as shown in **Supplementary Fig. 20**. The spherical  
54 agglomerates with sizes of around 50 nm in CB-opt is also visible from AFM, further  
55 supporting our GISAXS fitting results. However, AFM cannot identify the short-range  
56 Y6 aggregates (5-10 nm) observed from GISANS measurements as their sizes are  
57 below the resolution limit of the AFM tip we used (around 10 nm, see **Methods**).

58

59 We added the following sentences to line 470, page 26 of the main text.

60

61 **AFM measurements** JPK NanoWizard NanoOptics atomic force microscope (AFM)  
62 with a Tap300A1-G tip (40 N/m) was used for topography characterization of blend  
63 films. Measurements were carried out using non-contact mode with a piezoelectric tip  
64 oscillating at a fixed frequency (300 kHz) above the sample surface. For each  
65 measurement, tip was scanned over 256 pixels across a 2  $\mu\text{m}$  range at a rate of 1 Hz. A  
66  $2 \times 2 \mu\text{m}$  image was obtained for each sample. The root-mean-square (RMS) height  
67 fluctuations were obtained using the JPKSPM Data Processing software package.

68

69 2) The authors fitted the GISAXS and GISANS intensity profile using equation 1, and  
70 provided the Information of nanomorphology in PM6: *d*-Y6 film. In line 226-227, they  
71 claim that GISAXS profile gave “the correlation length ( $\xi$ ) of the amorphous  
72 intermixing phase and the size of the crystalline acceptor domain.” In my opinions, both  
73 the PM6 and *d*-Y6 are crystalline in the blend films, so why only crystalline domain of  
74 Y6 acceptor can be evaluated by fitting the equation?

75 **Reply:** We thank the reviewer for pointing out the potential confusion. The scattering  
76 contrast of a blend film under X-ray arises from the different SLDs of constituent  
77 materials. For PM6 and Y6 with similar carbon/hydrogen compositions, this is mainly  
78 induced by their different degree of crystallinity in blend films. Based on our previous  
79 experience, NFA small molecules typically show stronger scattering of X-ray than D:A  
80 polymer donor due to their stronger degree of crystallinity [*Nat. Commun.* 12, 6226  
81 (2021)]. Furthermore, in the blend film, it has been shown that Y6 tend to form denser  
82 and stronger crystals in blend films, substantially reducing the crystallinity of PM6 [*Adv*  
83 *Mater.*, e2302005 (2023)]. Therefore, for the fitting of our GISAXS results, we choose  
84 the DAB model to account for the amorphous region of the PM6/*d*-Y6 mixtures and the  
85 fractal model to account for the *d*-Y6 crystalline domains.

86

87 3) Would the authors explain the reason to choose a PM6:Y6 BHJ blend as the active  
88 layers in OPV devices instead of PM6: *d*-Y6? Since all the information on the  
89 nanomorphology of blend films comes from PM6: *d*-Y6, the corresponding devices are  
90 better to be tested for data consistency, although the performance of two devices  
91 comprising PM6:Y6 and PM6: *d*-Y6 may be identical (as shown in Fig. S8b)

92 Others:

93 **Reply:** We thank the reviewer for the insightful suggestions. The reason we chose to  
94 display the data of PM6:Y6 in the main text is to emphasis that the GISANS results we  
95 obtained from PM6:*d*-Y6 are also applicable to normal non-deuterated devices.  
96 Deuteration is expensive, we have no intention to apply deuteration to improve the



97 device performance, which is also not feasible for mass production. We just want to  
98 employ it as a powerful labeling tool for the research of OPV morphology.

99

100 To understand the impact of deuteration on morphology, optoelectronic properties, and  
101 device performance, we have shown in **Fig. 1c, d**, and **Supplementary Fig. 10-12** that  
102 deuteration does not change the morphological of Y6 molecules in neat and blend films  
103 and thus does not notably impact on and optoelectronic properties and device  
104 performance. We further fabricated a new batch of PM6:Y6 and PM6:*d*-Y6 devices  
105 under three different processing conditions mentioned in the main text to compare their  
106 performances as shown in **Supplementary Fig. 17** and summarized their detailed  
107 device parameters in **Supplementary Table 3**.

108

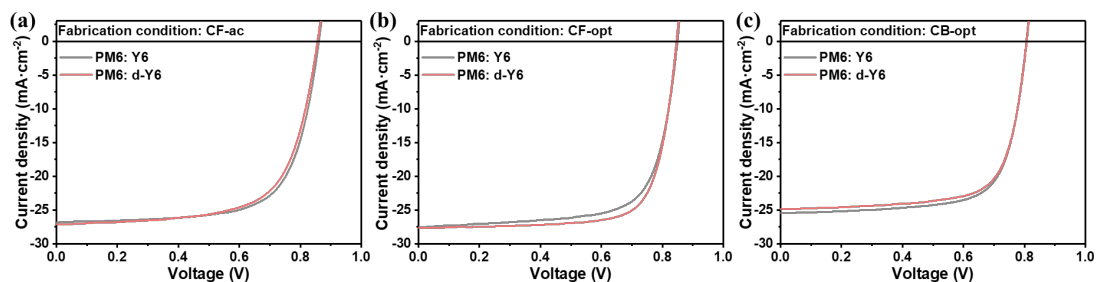

109

110 **Supplementary Fig. 17** Typical J-V curves of the devices based on PM6:Y6 and  
111 PM6:*d*-Y6 under three different conditions (**a** CF-ac, **b** CF-opt, **c** CB-opt) mentioned  
112 in the main text.

113

114 **Supplementary Table 3** A summary of device characteristics of PM6:Y6 and PM6:*d*-  
115 Y6 systems under three different processing conditions mentioned in the main text.

| Blends                 | $V_{oc}$ (V) <sup>d</sup> | $J_{sc}$ (mA·cm <sup>-2</sup> ) <sup>d</sup> | FF (%) <sup>d</sup> | PCE (%) <sup>d</sup> |
|------------------------|---------------------------|----------------------------------------------|---------------------|----------------------|
| PM6: Y6 <sup>a</sup>   | 0.865<br>(0.861±0.003)    | 26.9<br>(26.7±0.2)                           | 69.7<br>(69.0±0.5)  | 16.3<br>(15.9±0.3)   |
| PM6: d-Y6 <sup>a</sup> | 0.856<br>(0.855±0.003)    | 27.1<br>(26.7±0.3)                           | 67.2<br>(66.8±0.5)  | 15.6<br>(15.2±0.2)   |
| PM6: Y6 <sup>b</sup>   | 0.853<br>(0.850±0.002)    | 28.0<br>(27.7±0.5)                           | 74.4<br>(74.1±0.4)  | 17.8<br>(17.4±0.3)   |
| PM6: d-Y6 <sup>b</sup> | 0.846<br>(0.843±0.002)    | 27.7<br>(27.7±0.2)                           | 75.1<br>(74.7±0.3)  | 17.6<br>(17.4±0.2)   |
| PM6: Y6 <sup>c</sup>   | 0.806<br>(0.798±0.006)    | 25.5<br>(24.7±0.6)                           | 72.2<br>(71.5±0.5)  | 14.8<br>(14.1±0.5)   |
| PM6: d-Y6 <sup>c</sup> | 0.807<br>(0.807±0.003)    | 24.9<br>(24.6±0.5)                           | 72.1<br>(72.0±0.4)  | 14.5<br>(14.3±0.2)   |

116

117 <sup>a</sup> As-cast w/o CN & TA. <sup>b</sup> CF-opt (w/ 0.5% CN & TA 90°C 5min). <sup>c</sup> CB-opt (w/ 0.5%

118 CN & TA 90°C 5min). <sup>d</sup> Average values with their standard deviations (in parentheses)

119 are obtained from 5 independent devices.

120

121 PM6:Y6 and PM6:d-Y6 show similar performances in terms of all three photovoltaic

122 parameters under each processing condition, confirming the validity of our analysis.

123 We added the following sentences on line 272, page 15 in the main text.

124

125 Under each processing condition, PM6:Y6 and PM6:d-Y6 devices show similar

126 performance as shown in **Supplementary Fig. 17** and **Supplementary Table 3**,

127 suggesting that the GISANS results obtained from PM6:d-Y6 blend films are relevant

128 for normal non-deuterated devices as well.

129

130 We updated the device performances in Table 1 of the main text.

131

132 **Table 1** A summary of fitted domain sizes and device characteristics of PM6:Y6

133 systems.

| Samples <sup>a</sup> | $\xi$<br>(nm) | $2R_{gc}$<br>(nm) | $2R_{ga}$<br>(nm) | $V_{oc}$ <sup>b</sup><br>(V) | $J_{sc}$ <sup>b</sup><br>(mA cm <sup>-2</sup> ) | FF <sup>b</sup><br>(%) | PCE <sup>b</sup><br>(%) |
|----------------------|---------------|-------------------|-------------------|------------------------------|-------------------------------------------------|------------------------|-------------------------|
| CF-ac                | 45.6          | 33.1              | 7.8               | 0.865<br>(0.861±0.003)       | 26.9<br>(26.7±0.2)                              | 69.7<br>(69.0±0.5)     | 16.3<br>(15.9±0.3)      |

|        |      |                   |      |                        |                    |                    |                    |
|--------|------|-------------------|------|------------------------|--------------------|--------------------|--------------------|
| CF-opt | 49.4 | 29.4              | 10.7 | 0.853<br>(0.850±0.002) | 28.0<br>(27.7±0.5) | 74.4<br>(74.1±0.4) | 17.8<br>(17.4±0.3) |
| CB-opt | N/A  | 58.1 <sup>c</sup> | 7.5  | 0.806<br>(0.798±0.006) | 25.5<br>(24.7±0.6) | 72.2<br>(71.5±0.5) | 14.8<br>(14.1±0.5) |

---

134 <sup>a</sup> D/A = 1/1.2 (w/w). <sup>b</sup> Average values with their standard deviations (in parentheses)  
 135 are obtained from 15 independent devices. <sup>c</sup> The 2R<sub>gc</sub> of the CB-opt film is obtained  
 136 from the GISAXS fitting.

137

138 4) line 57, the “research” should be plural so “has” is used wrongly in grammar.

139 **Reply:** Thanks for your correction; we have already made the necessary changes.

140 5) line 91, the “challengg” is a typo.

141 **Reply:** Thanks for your correction; we have already made the necessary changes.

142 6) line 103, “not” in the term of “it originates not from crystalline phases...” is  
 143 inappropriately expressed in grammar.

144 **Reply:** Thanks for your correction; we have already made the necessary changes.

145 7) line 129, the “aggregation” should be singular.

146 **Reply:** Thanks for your correction; we have already made the necessary changes.

147 8) line 137, “Supplementary Fig. 6” should be “Supplementary Fig. 7”.

148 **Reply:** Thanks for your correction; we have already made the necessary changes.

149 9) line 202, the correspondence of fig. 3a and 3b to GISANS and GISAXS is an error.

150 **Reply:** Thanks for your correction; we have already made the necessary changes.

151

152

153 **Reviewer #2:**

154 Comments:

155 The main novelty of this work is that the authors deuterated the non-fullerene acceptor  
156 (NFA) Y6 to overcome the lack of neutron contrast in OPV films based on NFAs. This  
157 allowed them to study the nano-morphology of the OPV films using GISANS. This  
158 work is merely incremental, and it lacks the originality needed to be published in this  
159 journal.

160 In the abstract the authors say that their work uncovers "for the first time" the  
161 amorphous nanomorphology of OPV films. This is not correct – this has been addressed  
162 before either using neutron scattering or Resonant Soft X-ray Scattering (RSoXS)  
163 techniques.

164 Neutron scattering (SANS and Neutron reflectivity) have been previously used  
165 extensively to study fullerene-based OPVs and the authors are advised to improve their  
166 literature survey and include some important references that are missing. For example,  
167 these below among many others.

168 Wienhold, K.S., "Organic solar cells probed with advanced neutron scattering  
169 techniques" Applied Physics Letters, 116, 120504 (2020)

170 Zhang, Y. et al, "Understanding and controlling morphology evolution via DIO  
171 plasticization in PffBT4T-2OD/PC71BM devices", Scientific Reports 7, 44269 (2017)

172 Chen D. "P3HT/PCBM Bulk Heterojunction Organic Photovoltaics: Correlating  
173 Efficiency and Morphology", Nano Lett. 2011, 11, 2, 561–567

174 Bernardo, G. et al "Impact of 1,8-diiodooctane on the morphology of organic  
175 photovoltaic (OPV) devices – A Small Angle Neutron Scattering (SANS) study",  
176 Polymer Testing 82 (2020) 106305

177

178 **Reply:** We appreciate the reviewer's insightful comments and suggestions. We believe  
179 there may be a misunderstanding regarding our definition of "amorphous

180 nanomorphology of organic photovoltaic thin films”. In our work, it refers to  
181 morphology within the **amorphous donor:acceptor intermixed domains**. Through a  
182 thorough literature search, we have ensured that this morphology has not been detected  
183 previously.

184

185 Next, we agree that neutron scattering techniques, including SANS and Neutron  
186 reflectivity, have been previously used extensively to study **fullerene-based OPVs**. In  
187 the introduction section of the original manuscript (line 76-90, page 5), we wrote:

188

189 Small-angle neutron scattering (SANS) and neutron reflectivity (NR) have been  
190 employed to investigate the nanostructure of organic solar cells based on fullerene  
191 acceptors since the dominant carbon components in fullerene derivatives provide  
192 sufficient SLD contrast relative to organic donor materials<sup>28,29</sup>. In a study by Dadmun  
193 *et al.*, SANS was utilized for the first time to reveal the miscibility of PCBM in P3HT,  
194 the average PCBM domain size, and the interfacial area between PCBM and the P3HT-  
195 rich phase<sup>30</sup>. The results of SANS experiments conducted by Nedoma *et al.* indicated  
196 that the phase separation between PCBM and P3HT could be controlled by device  
197 fabrication conditions<sup>31</sup>. In 1999, P. Müller-Buschbaum *et al.* developed grazing  
198 incidence small-angle neutron scattering (GISANS) to enhance the signal-to-noise ratio  
199 and scattering volume with the grazing incidence geometry<sup>32</sup>. In subsequent studies,  
200 Matthias *et al.* first applied GISANS in OPV studies and investigated the phase  
201 separation and molecular intermixing in the P3HT/PC<sub>61</sub>BM bulk heterojunction<sup>33</sup>. In  
202 2018, W. Wang *et al.* used time-of-flight (TOF)-GISANS in the P3HT:PC<sub>61</sub>BM bulk  
203 heterojunction thin film and quantitatively determined the molecular miscibility  
204 between P3HT and PC<sub>61</sub>BM as well as the depth-dependent morphology changes  
205 induced by additives<sup>28</sup>.

206

207 We also thank the reviewer for reminding us of more relevant literature. Particularly,

208 the paper [*Chem. Phys.* 427, 142-146 (2013).] introduced a new quasi-elastic neutron  
209 scattering (QENS) to monitor the motions of the polymer side-chains of P3HT which  
210 were slowed down upon addition and further crystallization of the PCBM molecules.  
211 We have added all references mentioned by the reviewer to the following paragraph on  
212 page 5 of the revised main text.

213

214 Small-angle neutron scattering (SANS), neutron reflectivity (NR) and quasi-elastic  
215 neutron scattering (QENS) have been employed to investigate the nanostructure,  
216 dynamic fluctuations of OPV active layers composed of fullerene acceptors since the  
217 dominant carbon components in fullerene derivatives provide sufficient SLD contrast  
218 relative to organic donor materials<sup>28,29</sup>. In the study by Dadmun *et al.*, SANS was  
219 utilized for the first time to reveal the miscibility of PCBM in P3HT, the average PCBM  
220 domain size, and the interfacial area between PCBM and the P3HT-rich phases<sup>30</sup>. The  
221 results of SANS experiments conducted by Nedoma *et al.* indicated that the phase  
222 separation between PCBM and P3HT could be controlled by device fabrication  
223 conditions<sup>31</sup>. More following research also demonstrated the nanomorphology of  
224 fullerene based organic solar cells by SANS<sup>32-34</sup>. In terms of dynamic information,  
225 quasi-elastic neutron scattering (QENS) was utilized to monitor the motions of the side-  
226 chains of P3HT polymers which were slowed down upon addition and further  
227 crystallization of the PCBM molecules<sup>35,36</sup>. In 1999, P. Müller-Buschbaum *et al.*  
228 developed grazing incidence small-angle neutron scattering (GISANS) to enhance the  
229 signal-to-noise ratio and scattering volume with the grazing incidence geometry<sup>37</sup>.  
230 Matthias *et al.* first applied GISANS in OPV studies and investigated the phase  
231 separation and molecular intermixing in the P3HT/PC<sub>61</sub>BM bulk heterojunction<sup>38</sup>.  
232 Subsequently, this technique was applied by Guo *et al.* to study the impact of alcohol  
233 post treatment on inner phase structure of PTB7:PC<sub>71</sub>BM blend films<sup>39</sup>.

234

235 In summary, all these references are focused on using transmission-mode SANS or

236 GISANS to probe the morphology of fullerene-based blend films, taking advantage of  
237 the much stronger scattering contrast between fullerene molecules and polymer donors  
238 under neutron beam. The same methodology cannot be directly transferred to  
239 polymer:non-fullerene acceptor (NFA) blend films where donor and acceptor molecules  
240 have similar carbon: hydrogen ratios and thus similar SLDs under both X-ray and  
241 neutron. This challenge motivates us to combine targeted deuteration and GISANS to  
242 further probe morphology in these NFA-based blend systems. Therefore, the references  
243 mentioned by the reviewer do not undermine the originality of our work but rather  
244 highlighting the innovation in our approach.

245

246 We added the following works to our reference list.

247

248 32 Bernardo, G. *et al.* Impact of 1,8-diiodooctane on the morphology of organic  
249 photovoltaic (opv) devices – a small angle neutron scattering (sans) study.  
250 *Polymer Testing* **82** (2020).

251 33 Chen, D., Nakahara, A., Wei, D., Nordlund, D. & Russell, T. P. P3ht/pcbm bulk  
252 heterojunction organic photovoltaics: Correlating efficiency and morphology.  
253 *Nano Lett* **11**, 561-567 (2011).

254 34 Zhang, Y. *et al.* Understanding and controlling morphology evolution via dio  
255 plasticization in pffbt4t-2od/pc(71)bm devices. *Sci Rep* **7**, 44269 (2017).

256 35 Paternó, G., Cacialli, F. & García-Sakai, V. Structural and dynamical  
257 characterization of p3ht/pcbm blends. *Chem. Phys.* **427**, 142-146 (2013).

258 36 Wienhold, K. S., Jiang, X. & Müller-Buschbaum, P. Organic solar cells probed  
259 with advanced neutron scattering techniques. *Appl. Phys. Lett.* **116** (2020).

260 39 Guo, S., Cao, B., Wang, W., Moulin, J.-F. & Müller-Buschbaum, P. Effect of  
261 alcohol treatment on the performance of ptb7:Pc71bm bulk heterojunction solar  
262 cells. *ACS Appl. Mater. Interfaces* **7**, 4641-4649 (2015).

263

264 **Reviewer #3:**

265 Comments:

266 Reviewer #3 (Remarks to the Author):

267

268 The authors used a combination of neutron scattering - in terms of GISANS technique

269 - and deuteration to probe the nanomorphology of the PM6:d-Y6 blend film. The  
270 deuteration was selectively done for the NFA Y6 (d-Y6). The measurements were  
271 underpinned by MD calculations. The study highlighted a specific short-range  
272 aggregation of Y6 - as an intrinsic feature of this NFA, that was concluded to be a key  
273 contributor to the high photovoltaic performance of most Y6-containing organic bulk  
274 heterojunction systems. Indeed, the authors studied other polymers than PM6, and have  
275 supported the neutron data by measurements using different x-ray and light-based  
276 techniques.

277 The manuscript is dense, organized and well written. The topic, techniques and findings  
278 warrant publication in Nature Communications after considering the following  
279 comment.

280 The only concern readers, who might be interested in applying neutron scattering and  
281 associated deuteration in their research on OPVs, would be to have some more targeted  
282 references on the application of neutron scattering and deuteration to study morphology  
283 and local properties, including dynamics, beyond GISANS by including other neutron-  
284 based techniques. In this context, the authors are invited to enrich the introduction and  
285 the reference list by considering recent works on binary and ternary blend, either with  
286 acceptors being fullerenes (PCBM, etc) or NFAs (O-IDTBR, etc).

287

288 **Reply:** We really appreciate the reviewer's positive comments and insightful  
289 suggestions. Following the reviewer's suggestion, we have enriched introduction and  
290 the reference list by including more important works on ternary OPVs incorporating  
291 either fullerene-based acceptors [*J. Mater. Chem. A* 7, 20713-20722 (2019)] or NFAs  
292 like IDTBR [*Nat. Mater.* 16, 363-369 (2017).] and Y6 [*Dyes Pigm.* 181, 108613 (2020)]  
293 as the third component. We pointed out that despite the ternary (and quaternary) has  
294 improved the efficiency and stability of OPVs, the exact microscopic origin remains  
295 under debate [*Nat. Rev. Mater.* 8, 456-471 (2023). & *Nat. Energy* 8, 978-988 (2023)].  
296 This can be largely attributed to the similar chemical structures between donor and



297 acceptor materials (in case of NFAs) or the fact that the amount of dopant added is small  
298 compared to the host materials (in case of fullerenes) that renders morphology  
299 characterization challenging. This dilemma could potentially be resolved by combining  
300 deuteration labelling and GISANS, which will be the focus of our future work.

301

302 We added the following sentences to line 105 of page 6.

303

304 The same issue also hinders the full characterization of ternary (and quaternary) blend  
305 films because the dopants used typically have similar chemical structures with host  
306 materials or the amount of dopants added is small. Therefore, although ternary  
307 strategies incorporating both fullerene<sup>40</sup> and NFAs (e.g. IDTBR<sup>41</sup> and Y6<sup>42</sup>) have  
308 proved effective in improving the efficiency and stability of OPVs, the exact  
309 microscopic origin remains controversial<sup>43,44</sup>.

310

311 In addition to SANS and GISANS, we also added a brief introduction on quasi-elastic  
312 neutron scattering (QENS) on line 91 of page 5.

313

314 In terms of dynamic information, quasi-elastic neutron scattering (QENS) was utilized  
315 to monitor the motions of the polymer side-chains of P3HT which were slowed down  
316 upon addition and further crystallization of the PCBM molecules<sup>35,36</sup>.

317

318

319 We have also reviewed a few more examples of previous studies combining deuteration  
320 and neutron scattering in other fields beyond organic photovoltaics on line 111 of page  
321 6.

322

323 This technique has been previously applied to study e.g., the structure of conducting  
324 polymers<sup>45</sup> and biological macromolecules<sup>46</sup>, yet it has not been applied to probe the

325 morphology of OPV active layers.

326

327 The following references were added to the main text.

328

329 35 Paternó, G., Cacialli, F. & García-Sakai, V. Structural and dynamical  
330 characterization of p3ht/pcbm blends. *Chem. Phys.* **427**, 142-146 (2013).

331 36 Wienhold, K. S., Jiang, X. & Müller-Buschbaum, P. Organic solar cells probed  
332 with advanced neutron scattering techniques. *Appl. Phys. Lett.* **116** (2020).

333 40 Pan, M.-A. *et al.* 16.7%-efficiency ternary blended organic photovoltaic cells  
334 with pcbm as the acceptor additive to increase the open-circuit voltage and  
335 phase purity. *J. Mater. Chem. A* **7**, 20713-20722 (2019).

336 41 Baran, D. *et al.* Reducing the efficiency–stability–cost gap of organic  
337 photovoltaics with highly efficient and stable small molecule acceptor ternary  
338 solar cells. *Nat. Mater.* **16**, 363-369 (2017).

339 42 Jiang, B.-H. *et al.* The role of y6 as the third component in fullerene-free ternary  
340 organic photovoltaics. *Dyes Pigm.* **181**, 108613 (2020).

341 43 Günther, M. *et al.* Models and mechanisms of ternary organic solar cells. *Nature*  
342 *Reviews Materials* **8**, 456-471 (2023).

343 44 Wang, Y. *et al.* Origins of the open-circuit voltage in ternary organic solar cells  
344 and design rules for minimized voltage losses. *Nature Energy* **8**, 978-988 (2023).

345 45 Shao, M. *et al.* The isotopic effects of deuteration on optoelectronic properties  
346 of conducting polymers. *Nat Commun* **5**, 3180 (2014).

347 46 Jeffries, C. M. *et al.* Preparing monodisperse macromolecular samples for  
348 successful biological small-angle x-ray and neutron-scattering experiments. *Nat*  
349 *Protoc* **11**, 2122-2153 (2016).

350

351 **Reviewer #4:**

352 Comments:

353 Reviewer #4 (Remarks to the Author):

354

355 Deuteration-enhanced neutron is cleverly applied to GISANS test, and the unique short-  
356 range aggregation behavior of Y6 in the D/A blending region is effectively detected,  
357 which also confirms the experimental results of other research groups. Prof Lu and co-  
358 workers provide a novel method for detecting the aggregate state of non-crystalline  
359 domain in active layer of OSCs. However, SANS is already a conventional and mature  
360 characterization technique, and deuterated materials have also been applied to SANS.

361 In addition, the PM6:Y6 device in the paper is a very conventional, although the authors  
362 claim that directionally deuterated SANS technology offers opportunities for complex  
363 active layer systems and intermolecular interaction mechanisms. The innovation of this  
364 article is insufficient. The authors did not validate the proposed large short-range  
365 aggregation of acceptors in the D/A blend region as a key to recent high-performance  
366 organic solar cells and provide insights for improving the efficiency or stability of  
367 organic solar cells, so it is not recommended for publication in Nature Communication.

368

369 **Reply:** We appreciate the thoughtful comments provided by the reviewer and have  
370 carefully addressed them point-by-point as detailed in the following response. In  
371 response to the observation that SANS and deuteration have been previously applied  
372 together, we wish to highlight the unique contribution of our work. While this  
373 combination has been utilized in other fields, for instance, biology systems, our work  
374 represents the first application to investigate the amorphous nanomorphology in organic  
375 photovoltaic thin films. In addition, the reason we chose to use the conventional system  
376 of PM6:Y6 to demonstrate this methodology is because we want to highlight its  
377 generality, while recent advancements on OPV performance often utilize Y-series  
378 acceptors. Following the reviewer's suggestion, in the revised manuscript, we further  
379 deuterate another Y-series molecule-Y7 to demonstrate the generality of our results.

380

381 2. Prof. Ye has demonstrated that deuterated solvents can improve the performance of  
382 organic solar cells (Aggregate 2023, 4, e289). d-Y6 shows similar photoelectric  
383 properties to Y6 and does not affect the morphology of the active layer. When blended  
384 with PM6 to make a device, how does the performance of d-Y6 compare to that of Y6?

385

386 **Reply:** We thank the reviewer for reminding us of this important work. In Prof. Ye's  
387 work, the deuterium substitution is on **solvent molecules**, not **acceptors**. The  
388 deuterated solvent reduces their molar volume and polarizability by decreasing the

389 length and dipole moment of C-H bonds, resulting in suppressed solubility parameter  
390 ( $\delta$ ) of active layer materials in deuterated solvents, and therefore increase the  
391 crystallinity of the casted film. We did not observe similar device performance  
392 improvement with the deuteration of Y6. Prof. Ye and co-workers recently

393

394 In **Supplementary Fig. 11** and **12b**, we have shown that PM6:Y6 and PM6:*d*-Y6 blend  
395 films have similar crystal structures and photovoltaic performances. To further stress  
396 this point, we also compared PM6:Y6 and PM6:*d*-Y6 devices fabricated under three  
397 different conditions (as-cast, CF-opt, and CB-opt). Under each condition, the PM6:*d*-  
398 Y6 device shows similar performance in terms of all three photovoltaic parameters ( $FF$ ,  
399  $J_{sc}$ , and  $V_{oc}$ ) with the corresponding PM6:Y6 device. This confirms that deuteration of  
400 Y6 has negligible impact on their morphological and optoelectronic properties in both  
401 neat and blend films. We added the J-V curves to **Supplementary Fig. 17** and detailed  
402 device characteristics to **Supplementary Table 3**.

403

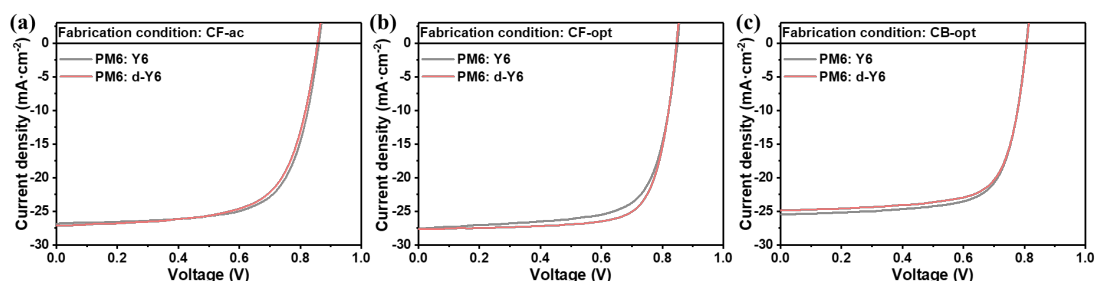

404

405 **Supplementary Fig. 17** Typical J-V curves of the devices based on PM6:Y6 and  
406 PM6:*d*-Y6 under three different conditions (**a** CF-ac, **b** CF-opt, **c** CB-opt) mentioned  
407 in the main text.

408

409 **Supplementary Table 3** A summary of device characteristics of PM6:Y6 and PM6:*d*-  
410 Y6 systems under three different processing conditions mentioned in the main text.

| Blends                 | $V_{oc}$ (V) <sup>d</sup> | $J_{sc}$ (mA·cm <sup>-2</sup> ) <sup>d</sup> | FF (%) <sup>d</sup>  | PCE (%) <sup>d</sup> |
|------------------------|---------------------------|----------------------------------------------|----------------------|----------------------|
| PM6: Y6 <sup>a</sup>   | 0.865<br>(0.861 ± 0.003)  | 26.9<br>(26.7 ± 0.2)                         | 69.7<br>(69.0 ± 0.5) | 16.3<br>(15.9 ± 0.3) |
| PM6: d-Y6 <sup>a</sup> | 0.856<br>(0.855 ± 0.003)  | 27.1<br>(26.7 ± 0.3)                         | 67.2<br>(66.8 ± 0.5) | 15.6<br>(15.2 ± 0.2) |
| PM6: Y6 <sup>b</sup>   | 0.853<br>(0.850 ± 0.002)  | 28.0<br>(27.7 ± 0.5)                         | 74.4<br>(74.1 ± 0.4) | 17.8<br>(17.4 ± 0.3) |
| PM6: d-Y6 <sup>b</sup> | 0.846<br>(0.843 ± 0.002)  | 27.7<br>(27.7 ± 0.2)                         | 75.1<br>(74.7 ± 0.3) | 17.6<br>(17.4 ± 0.2) |
| PM6: Y6 <sup>c</sup>   | 0.806<br>(0.798 ± 0.006)  | 25.5<br>(24.7 ± 0.6)                         | 72.2<br>(71.5 ± 0.5) | 14.8<br>(14.1 ± 0.5) |
| PM6: d-Y6 <sup>c</sup> | 0.807<br>(0.807 ± 0.003)  | 24.9<br>(24.6 ± 0.5)                         | 72.1<br>(72.0 ± 0.4) | 14.5<br>(14.3 ± 0.2) |

411

412 <sup>a</sup> As-cast w/o CN & TA. <sup>b</sup> CF-opt (w/ 0.5% CN & TA 90°C 5min). <sup>c</sup> CB-opt (w/ 0.5%

413 CN & TA 90°C 5min). <sup>d</sup> Average values with their standard deviations (in parentheses)

414 are obtained from 5 independent devices.

415

416 We also added the following sentences to line 272, page 15 of the main text.

417

418 Under each processing condition, PM6:Y6 and PM6:d-Y6 devices show similar

419 performance as shown in **Supplementary Fig. 17** and **Supplementary Table 3**,

420 suggesting that the GISANS results obtained from PM6:d-Y6 blend films are relevant

421 for normal non-deuterated devices as well.

422

423 2. To understand the formation mechanism of Y6 or d-Y6 aggregates, the single crystal

424 packing is more solid result compared to molecular dynamics simulation. The single

425 crystal of d-Y6 need to be provided.

426 **Reply:** Thanks a lot for the suggestion. Single-crystal analysis is a powerful tool to

427 capture crystalline packing motifs of conjugated molecules in their thermodynamically

428 stable states. However, this work is focusing on the **amorphous** morphology but not

429 the crystalline packing of Y6. Furthermore, it cannot predict the formation of short-

430 range Y6 aggregates within the **blend** film with polymer donors cast by spin coating.

431 Therefore, we believe the single crystal analysis of d-Y6 is not necessary here and MD

432 simulation is a more valid method to complement our experimental results to

433 understand the formation mechanism of short-range Y6 aggregates in thin films formed  
434 through non-equilibrium kinetic process.

435

436 3. The use of deuterated materials is costly and does not improve efficiency, has little  
437 application and is too costly, so the significance of this study is yet to be determined.

438 **Reply:** We thank the reviewer for raising this important concern. Yes, the deuteration  
439 of conjugated small molecules or even polymers is costly and it does not notably affect  
440 the performance of OPV devices as we have shown in the main text. We emphasize that  
441 our goal is to apply deuteration substitution as an effective labelling technique to  
442 complement GISANS measurements so that we could reveal the previously hidden  
443 short-range structure and establish robust processing-structure-performance  
444 relationships for OPVs. Therefore, we only need to synthesis a relatively small amount  
445 of deuterated materials (e.g. several tens of mg) to help us with morphology  
446 characterizations so the cost is affordable.

447 4.  $\xi$  in line 310 is in difference from in Table 1. Please check it.

448 **Reply:** Thanks for your correction; we have already made the necessary changes.

449 5. The scattering lengths of hydrogen and deuterium have opposite symbols, which  
450 allows SANS to use this contrast advantage to selectively label different parts of the  
451 study target system. Whether hydrogen in PM6 and deuterium in Y6 can be detected to  
452 more deeply interpret the molecular state in the amorphous domain?

453 **Reply:** We thank the reviewer for this inspiring suggestion. So far, we are making use  
454 of the enhanced contrast to probe the statistical averaged domain sizes of the crystalline  
455 and amorphous Y6. If we want to obtain the molecular state in the amorphous domain,  
456 we may need to design more delicate deuteration schemes on different functional  
457 groups for PM6 and Y6 and compare the scattering difference of different combinations  
458 to extract the detailed molecular state, which is way beyond the scope of this work.

459

460 6. The author has proved that short-range aggregation behavior is unique to Y6.

461 Whether other high-performance Y-series acceptors have similar behavior? The authors  
462 need to extend the corresponding experiment for d-L8-BO and d-BO-4Cl to support  
463 their conclusion.

464 **Reply:** We thank the reviewer for the valuable suggestions. To prove the generality of  
465 our findings for other Y-series NFAs, in the revised manuscript, we have synthesized a  
466 new Y-series NFA - *d*-Y7, which shares the same backbone with Y6 but with chlorinated  
467 end groups [*Nat. Commun.* 10, 1-8 (2019).]. The GISANS results confirmed that *d*-Y7  
468 shows a higher SLD of  $5.37 \times 10^{-6} \text{ \AA}^{-2}$  compared to Y7 ( $1.77 \times 10^{-6} \text{ \AA}^{-2}$ ). Encouragingly,  
469 the scattering feature associated with short-range aggregates was also observed in the  
470 blend film of PM6:*d*-Y7 with characteristic length of around 5.4 nm. Considering the  
471 similar molecular structures of Y6 and Y7, we anticipate that the prerequisite for  
472 forming short-range aggregates is the ability to maintain high backbone planarity. It has  
473 been shown previously that the beta side chains attached to the outer core group of Y6,  
474 regardless of their chain lengths and shapes, are crucial to suppress dihedral angle  
475 between core and end groups [*Energy Environ. Sci.* 13, 2422-2430 (2020). & *Nat. Rev.*  
476 *Mater.* 8, 839-852 (2023).]. Therefore, our conclusion should be general for most Y-  
477 series NFAs with side chains attached to this position.

478

479 We added the results of  $^1\text{H}$  and  $^{13}\text{C}$  NMR spectroscopy to the Supporting Information.

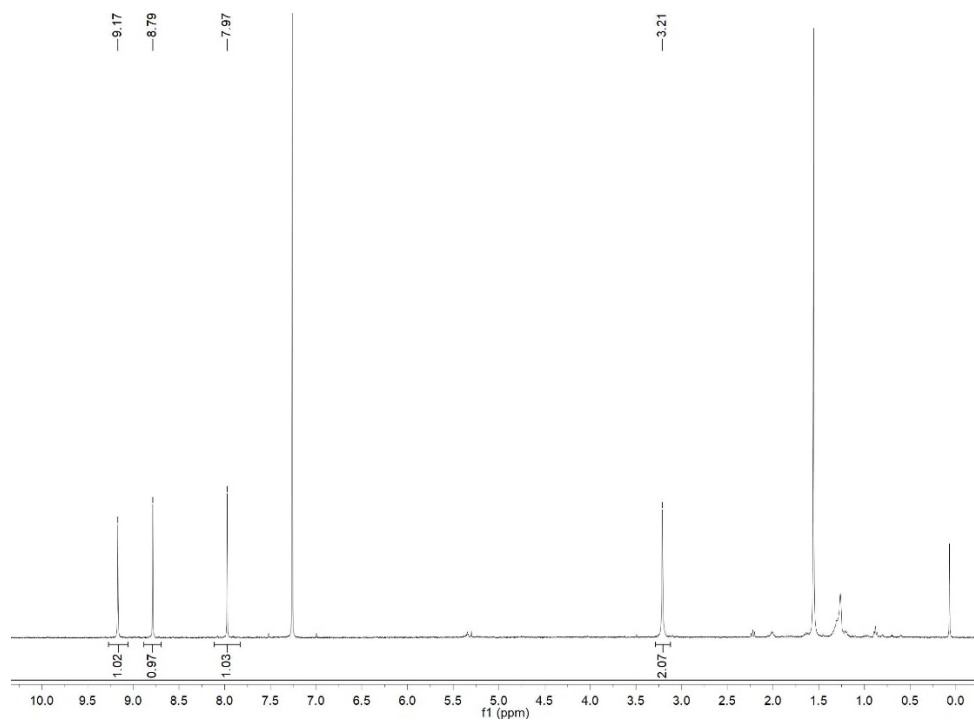

480

481 **Supplementary Fig. 5**  $^1\text{H}$  NMR spectrum of *d*-Y7.

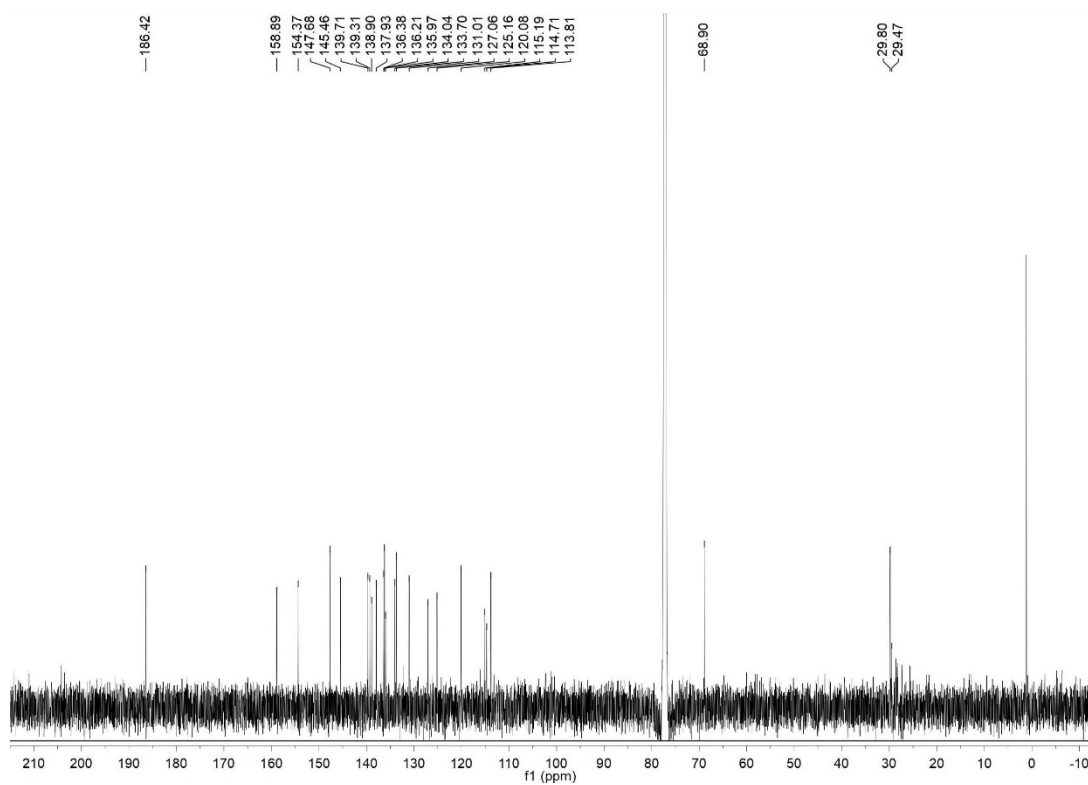

482

483 **Supplementary Fig. 6**  $^{13}\text{C}$  NMR spectrum of *d*-Y7.

484

485 ***d*-Y7** The material was synthesized following the same route as *d*-Y6.  $^1\text{H}$  NMR (400



486 MHz, Chloroform-*d*)  $\delta$  9.17 (s, 1H), 8.79 (s, 1H), 7.97 (s, 1H), 3.21 (s, 2H) ppm;  $^{13}\text{C}$   
 487 NMR (151 MHz, Chloroform-*d*)  $\delta$  186.42, 158.89, 154.37, 147.68, 145.46, 139.71,  
 488 139.31, 138.90, 137.93, 136.38, 136.21, 135.97, 134.04, 133.70, 131.01, 127.06,  
 489 125.16, 120.08, 115.19, 114.71, 113.81, 68.90, 29.80, 29.47 ppm.

490

491 The GISANS data of PM6:*d*-Y7 was added to **Supplementary Fig. 23**.

492

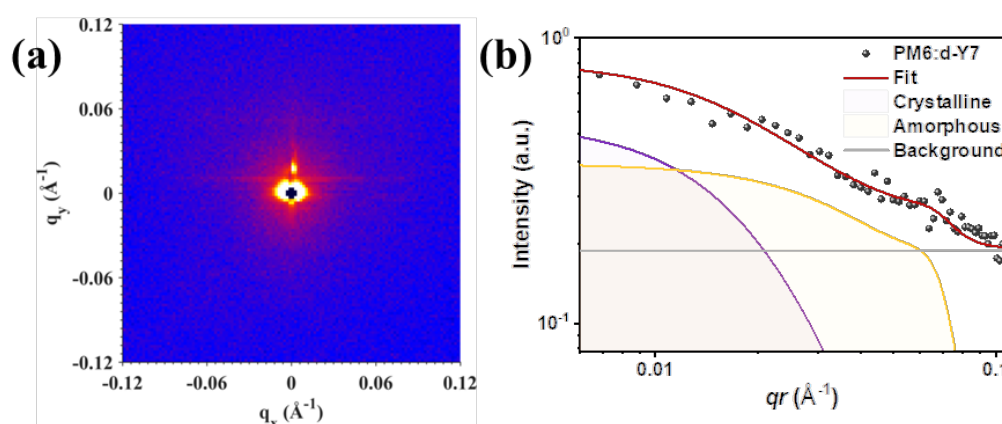

493

494 **Supplementary Fig. 23** 2D TOF-GISANS patterns of **a** PM6:Y7 and **b** PM6:*d*-Y7 with  
 495 their horizontal linecuts (dots) with best fits (solid line) shown in **c** and **d**, respectively.

496

497 We updated domain sizes in Supplementary Table 5.

498

499 **Supplementary Table 5** Morphology parameters fitted from the GISANS intensity  
 500 profiles ( $2R_{gc}$  is the crystallized acceptor domain size,  $2R_{ga}$  is the amorphous acceptor  
 501 domain size in the intermixing phase.)

| Active layer        | $2R_{gc}$ (nm) | $2R_{ga}$ (nm) |
|---------------------|----------------|----------------|
| PM6: <i>d</i> -Y7   | 13.8           | 5.4            |
| PM6: <i>d</i> -IDIC | 22             | N/A            |
| P3HT: <i>d</i> -Y6  | 33.7           | 7.5            |

|                       |      |     |
|-----------------------|------|-----|
| PTB7-Th: <i>d</i> -Y6 | 31.7 | 6.7 |
| J71: <i>d</i> -Y6     | 28.7 | 6.7 |

---

502

503

504 We modified the following sentences on line 124, page 6 of the main text.

505

506 Similar aggregates were observed in the blend films of *d*-Y6 with other polymer donors  
507 as well as in the blend film of PM6 with deuterated Y7 (*d*-Y7), a chlorinated Y6  
508 derivative<sup>47</sup>, yet no such scattering feature was observed in the film of PM6 blended  
509 with another deuterated NFA – IDIC<sup>48</sup>.

510

511 We modified the following sentences on line 355, page 20 of the main text.

512

513 To find out whether this short-range aggregation behavior is unique to Y-series NFAs,  
514 we performed deuteration substitution on Y7, a chlorinated Y6 derivative<sup>47</sup>, and IDIC,  
515 another high-performance NFA modified from ITIC<sup>48</sup>. The synthesis of *d*-Y7 follows  
516 the same route as *d*-Y6 while the synthesis route of *d*-IDIC can be found in  
517 **Supplementary Fig. 1d**. The corresponding <sup>1</sup>H and <sup>13</sup>CNMR spectra are shown in  
518 **Supplementary Fig. 5-8**, while the mass spectroscopy and elemental analysis for *d*-  
519 IDIC can be found in **Supplementary Fig. 9** and notes of Supporting Information,  
520 respectively. Upon deuteration, the neutron SLDs increase from  $1.77 \times 10^{-6}$  to  $5.37 \times 10^{-6}$   
521  $\text{\AA}^{-2}$  and  $1.85 \times 10^{-6}$  to  $1.09 \times 10^{-5} \text{\AA}^{-2}$  for Y7 and IDIC, respectively. However, the  
522 scattering feature related to short-range aggregates was only detected in the blend film  
523 of PM6:*d*-Y7 but not in PM6:*d*-IDIC, as shown in **Supplementary Fig. 23, 24** and  
524 **Supplementary Table 5**.

525

526 We added the following sentences to line 393, page 23 of the main text.

527

528 Since this unique feature has been observed in blend films of both Y6 and Y7, it likely

529 arises from their excellent backbone planarity compared to ITIC-based NFAs. It has  
530 been shown that the beta side chains attached to the outer core groups of Y6 molecules,  
531 regardless of their chain lengths and shapes, can induce steric hindrance effects to  
532 suppress dihedral angles between core and end groups<sup>61,62</sup>. Therefore, we anticipate that  
533 our conclusion should be generally applicable to Y-series NFAs with side chains  
534 attached to the same position.

535

536 We added the following references to the main text.

537

538 61 Wu, J. *et al.* Exceptionally low charge trapping enables highly efficient organic  
539 bulk heterojunction solar cells. *Energy & Environmental Science* **13**, 2422-2430  
540 (2020).

541 62 Luke, J., Yang, E. J., Labanti, C., Park, S. Y. & Kim, J.-S. Key molecular  
542 perspectives for high stability in organic photovoltaics. *Nature Reviews*  
543 *Materials* **8**, 839-852 (2023).

544

545 We added the following co-authors who synthesized *d*-Y7 to the author list.

546

547 Guilong Cai<sup>1,3,10</sup>, Yuhao Li<sup>1,2,10\*</sup>, Yuang Fu<sup>1,10</sup>, Hua Yang<sup>2</sup>, Le Mei<sup>4</sup>, Zhaoyang Nie<sup>5</sup>,

548 Tengfei Li<sup>6</sup>, Heng Liu<sup>1</sup>, Yubin Ke<sup>2</sup>, Xun-Li Wang<sup>7,8</sup>, Jean-Luc Brédas<sup>9</sup>, Man-Chung

549 Tang<sup>5</sup>, Xiankai Chen<sup>4</sup>, Xiaowei Zhan<sup>6,\*</sup> and Xinhui Lu<sup>1,\*</sup>

550

551 <sup>5</sup> Institute of Materials Research, Tsinghua Shenzhen International Graduate School,

552 Tsinghua University, 518055 Shenzhen, China.

553

554 We included their contributions to this manuscript on line 557, page 30 of the main text.

555

556 Z.N., M.-C.T. synthesized *d*-Y7.

557

558 7 . The  $^{13}\text{C}$  NMR and elemental analysis of new compounds need to be provided.

559 **Reply:** We thanks the reviewer for this important suggestion. We have added the  $^{13}\text{C}$   
560 NMR spectra and elemental analysis results of *d*-Y6 and *d*-IDIC to the Supporting  
561 Information.

562

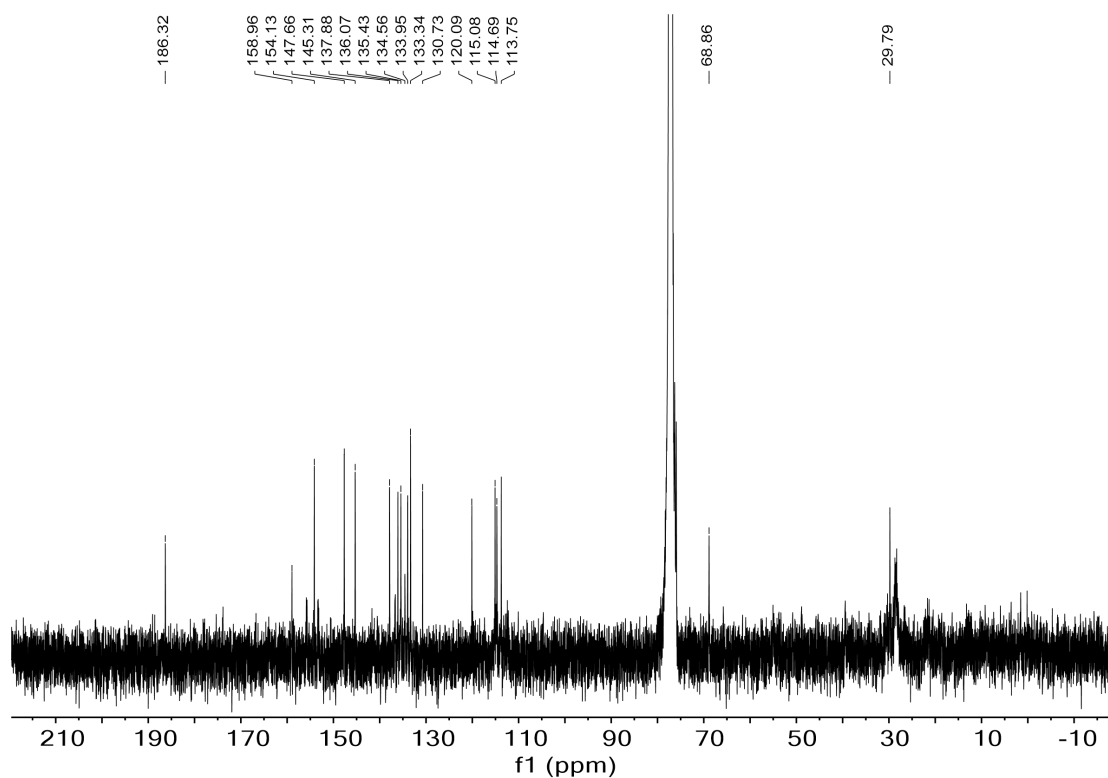

563

564 **Supplementary Fig. 3**  $^{13}\text{C}$  NMR spectrum of *d*-Y6.

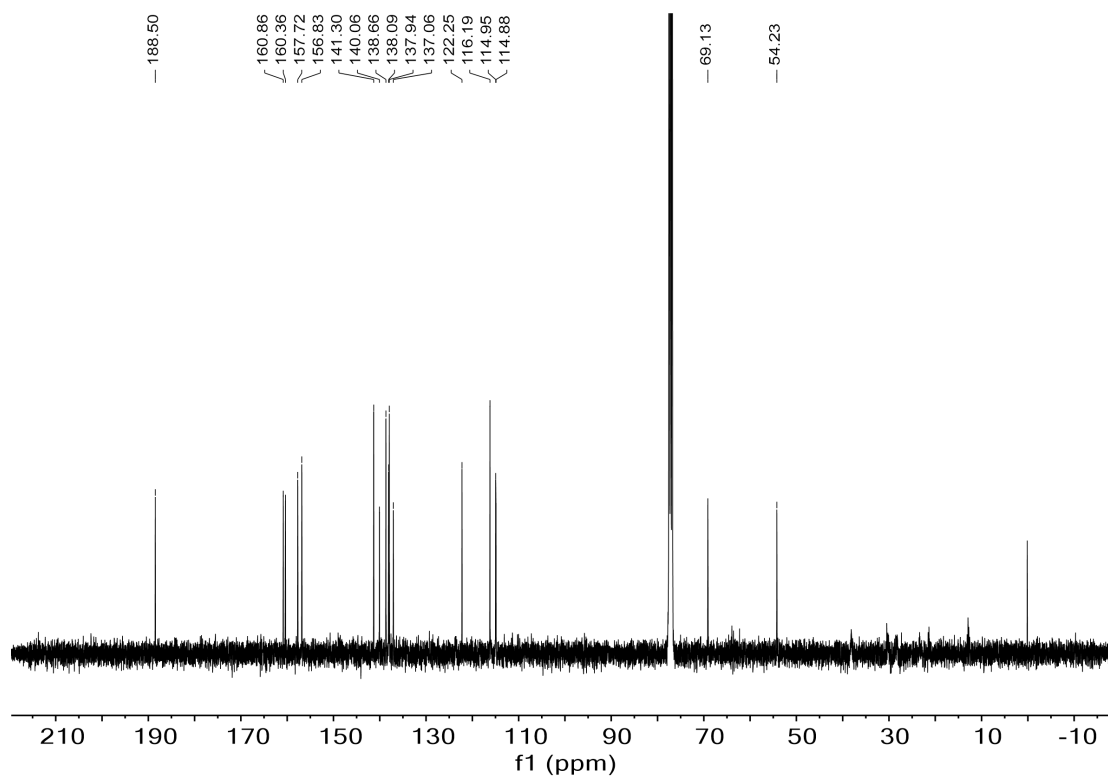

565

566 **Supplementary Fig. 8**  $^{13}\text{C}$  NMR spectrum of *d*-IDIC.

567 ***d*-Y6.** To a three-necked round bottom flask were added Compound 5 (220 mg, 0.2

568 mmol), *d*-2FIC (140 mg, 0.6 mmol), pyridine (0.15 mL) and chloroform (25 mL). The

569 mixture was deoxygenated with nitrogen for 20 min and then stirred at reflux for 12 h.

570 After cooling to room temperature, the mixture was poured into methanol (200 mL)

571 and filtered. The residue was purified by column chromatography on silica gel using a

572 mixture solvent as eluent (petroleum ether/dichloromethane, v/v = 1/1) to give a blue

573 solid (255 mg, 83%).  $^1\text{H}$  NMR (400 MHz, Chloroform-*d*)  $\delta$  9.2 (s, 2H), 3.2 (s, 4H).  $^{13}\text{C}$

574 NMR (100 MHz, Chloroform-*d*)  $\delta$  186.3, 159.0, 154.1, 147.7, 145.3, 137.9, 136.1,

575 135.4, 134.6, 134.0, 133.3, 130.7, 120.1, 115.1, 114.7, 113.7, 68.9, 29.8. HRMS

576 (MALDI) calculated for  $\text{C}_{82}\text{H}_6\text{D}_{80}\text{F}_4\text{N}_8\text{O}_2\text{S}_5$ : 1531.0429; found: 1531.0424 ( $\text{M}^+$ ).

577 Elemental analysis calculated for  $\text{C}_{82}\text{H}_7\text{D}_{80}\text{F}_4\text{N}_8\text{O}_2\text{S}_5$ : C, 64.23; N, 7.31. Found: C,

578 64.12; N, 7.13.

579 ***d*-IDIC.** To a three-necked round bottom flask were added Compound S12 (142 mg,  
580 0.2 mmol), *d*-IC (120 mg, 0.6 mmol), pyridine (0.15 mL) and chloroform (25 mL). The  
581 mixture was deoxygenated with nitrogen for 20 min and then stirred at reflux for 12 h.  
582 After cooling to room temperature, the mixture was poured into methanol (200 mL)  
583 and filtered. The residue was purified by column chromatography on silica gel using a  
584 mixture solvent as eluent (petroleum ether/dichloromethane, v/v = 1/1) to give a blue  
585 solid (173 mg, 81%). <sup>1</sup>H NMR (400 MHz, Chloroform-*d*) δ 9.0 (s, 2H), 7.7 (s, 2H), 7.6  
586 (s, 2H). <sup>13</sup>C NMR (100 MHz, Chloroform-*d*) δ 188.5, 160.9, 160.4, 157.7, 156.8, 141.3,  
587 140.1, 138.7, 138.1, 137.9, 137.1, 122.2, 116.2, 115.0, 114.9, 69.1, 54.2. HRMS  
588 (MALDI) calculated for C<sub>66</sub>H<sub>6</sub>D<sub>60</sub>N<sub>4</sub>O<sub>2</sub>S<sub>2</sub>: 1070.8388; found: 1070.8384 (M<sup>+</sup>).  
589 Elemental analysis calculated for C<sub>66</sub>H<sub>6</sub>D<sub>60</sub>N<sub>4</sub>O<sub>2</sub>S<sub>2</sub>: C, 73.96; N, 5.23. Found: C, 73.56;  
590 N, 5.07.

591 We modified the following sentence on line 145 of page 9.

592 The new compounds were fully characterized using <sup>1</sup>H and <sup>13</sup>C nuclear magnetic  
593 resonance (NMR) spectroscopy, mass spectrometry, and elemental analysis as shown  
594 in Fig. 1b, Supplementary Fig. 2-4, and note in Supporting Information, respectively.

595

596

597

598

599

## REVIEWERS' COMMENTS

Reviewer #1 (Remarks to the Author):

The authors have been fully addressed my concerns. The manuscript could be published as this version.

Reviewer #2 (Remarks to the Author):

The authors have carefully addressed all the reviewer comments and have substantially improved their literature survey.

In the discussion of their results the authors were now able to convince me about the originality of their work. In particular, is original the combination of NFA deuteration and GISANS to unravel the short-range aggregation of Y6 molecules embedded within the amorphous intermixing phase of polymer/Y6. As far as I know, this type of morphology has not been previously reported in BHJ OPVs. This work highlights the unique morphological advantage of Y6 and the important role of short-range aggregation in OPV performance.

I recommend this work to publish in Nature Communications in its current form.

Reviewer #3 (Remarks to the Author):

The authors addressed comments and amended the manuscript accordingly. Therefore I recommend its publication.

Reviewer #4 (Remarks to the Author):

In the revised manuscript, although part of the problems was addressed, some of key issues remain unaddressed clearly.

1) The use of deuterated materials is costly and does not improve efficiency, has little application and is too costly, please give a cost analysis for the synthesis of corresponding deuterated materials in comparison with the conventional materials.

2) d-L8-BO and d-BO-4Cl are more popular and more efficient Y-series acceptors and they showed different amount and type of deuterated atoms, the corresponding experiment for d-L8-BO and d-BO-4Cl will be more support their conclusion.

3) Carbon-fluorine coupling (in  $^{13}\text{C}$ ) for d-Y6 and d-L8-BO should be included in NMR data.



---

## **Responses to comments from reviewers**

We would like to thank the reviewers and the editor for their valuable time and comments, which have greatly helped to improve the quality of our paper. We have addressed the comments from each reviewer point by point and revised the manuscript accordingly. Our detailed responses are shown in blue and the corresponding revisions in both the manuscript and supplementary information are indicated with yellow highlights.

### **Reviewer #1:**

Comments:

The authors have been fully addressed my concerns. The manuscript could be published as this version.

**Reply:** We thank the reviewer for the positive comments.

### **Reviewer #2:**

Comments:

The authors have carefully addressed all the reviewer comments and have substantially improved their literature survey.

In the discussion of their results the authors were now able to convince me about the originality of their work. In particular, is original the combination of NFA deuteration and GISANS to unravel the short-range aggregation of Y6 molecules embedded within the amorphous intermixing phase of polymer/Y6. As far as I know, this type of morphology has not been previously reported in BHJ OPVs. This work highlights the unique morphological advantage of Y6 and the important role of short-range aggregation in OPV performance.

I recommend this work to publish in Nature Communications in its current form.

**Reply:** We appreciate the reviewer's insightful comments and suggestions.

---

**Reviewer #3:**

## Comments:

The authors addressed comments and amended the manuscript accordingly. Therefore I recommend its publication.

**Reply:** We really appreciate the reviewer's positive comments and insightful suggestions.

**Reviewer #4:**

## Comments:

In the revised manuscript, although part of the problems was addressed, some of key issues remain unaddressed clearly.

1) The use of deuterated materials is costly and does not improve efficiency, has little application and is too costly, please give a cost analysis for the synthesis of corresponding deuterated materials in comparison with the conventional materials.

**Reply:** We agree with the reviewer that the deuteration of OPV active layer materials is costly. However, we meant to apply it as a labelling technique to probe the morphology of novel organic blend films so the material consumption per project would be low. We quote from the work by Li et al. [*Synth. Met.* 281, 116904 (2021).] that the synthesis cost of Y6 molecules is 1000 USD/g. Since the prices of deuterated components are on average 2 to 3 times higher than the corresponding non-deuterated ones, we estimate that the cost of *d*-Y6 molecules would be around 2500 USD/g. In this project, we have only used around 50 mg of *d*-Y6, corresponding to a total cost of \$125. Therefore, we believe that targeted deuteration is cost-worthy and could be applied to study other novel organic optoelectronic materials in the future.

2) d-L8-BO and d-BO-4Cl are more popular and more efficient Y-series acceptors and they showed different amount and type of deuterated atoms, the corresponding

experiment for d-L8-BO and d-BO-4Cl will be more support their conclusion.

**Reply:** We thank the reviewer for raising this important concern. We chose to deuterate Y7, because it has similar chemical structure to Y6, as an easy and fast showcase for the generality of our work. In the coming work, we indeed to plan to extend our study to more high-performance Y-series molecules such as L8-BO and BO-4Cl to establish structure-performance relationships.

3) Carbon-fluorine coupling (in  $^{13}\text{C}$ ) for d-Y6 and d-L8-BO should be included in NMR data.

**Reply:** We thank the reviewer for this important comment. We have added the enlarged  $^{13}\text{C}$  NMR spectrum of *d*-Y6 (between 150 and 160 ppm) to the inset of **Supplementary Fig.3**. The presence of C-F coupling is evidenced by the doublet at  $\delta$  155.64 (d,  $J=16.2$  Hz), 153 (dd,  $J=14.8, 7.3$  Hz).

Supplementary Fig.3 has been modified as shown below.

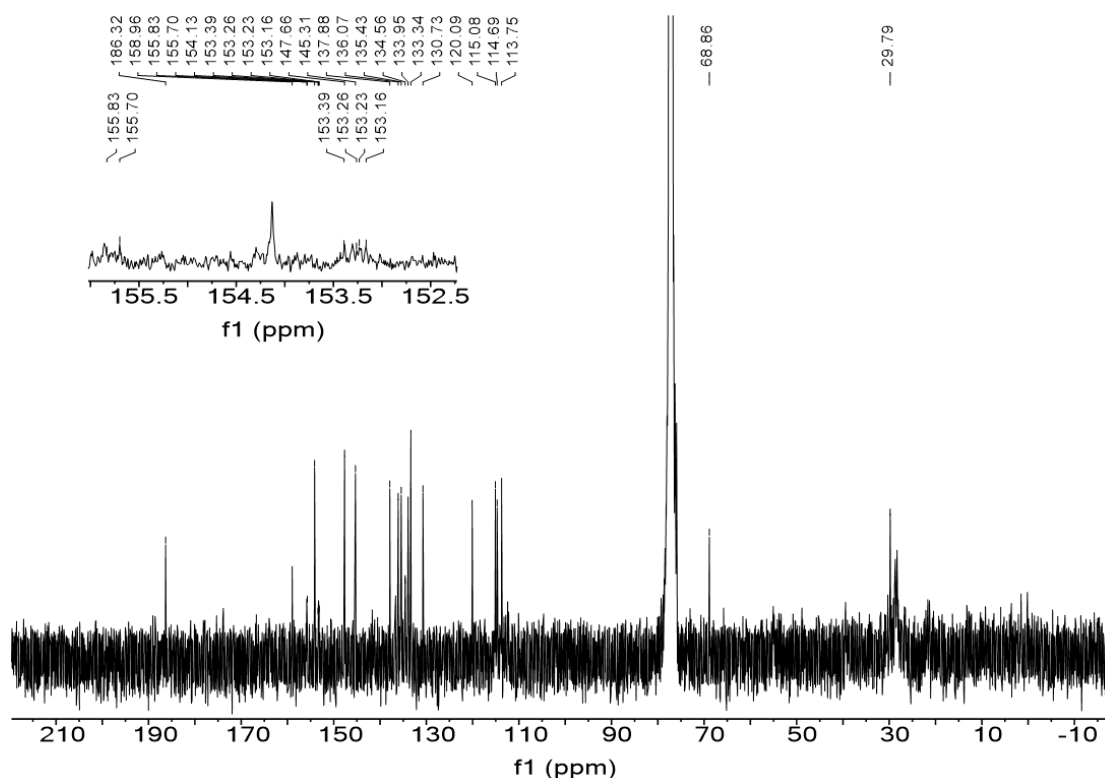

**Supplementary Fig. 3**  $^{13}\text{C}$  NMR spectrum of *d*-Y6. The inset is the enlarged spectrum

---

between 152 and 156 ppm to highlight the presence of C-F coupling.

We have also added the following comments in Supporting Information.

$^{13}\text{C}$  NMR (100 MHz, Chloroform-*d*)  $\delta$  186.3, 159.0, 154.1, 147.7, 145.3, 137.9, 136.1, 135.4, 134.6, 134.0, 133.3, 130.7, 120.1, 115.1, 114.7, 113.7, 68.9, 29.8. The presence of C-F coupling is evidenced by the doublet at  $\delta$  155.64 (d,  $J=16.2$  Hz), 153 (dd,  $J=14.8$ , 7.3 Hz).
