# Supplementary material for: Deuteration-enhanced neutron contrasts to probe amorphous domain sizes in organic photovoltaic bulk heterojunction films
Source: PubMed Central journal article supplement (PMC10981694; doi:10.1038/s41467-024-47052-7), 2024-03-30
Supplement: 41467_2024_47052_MOESM3_ESM.pdf [file 41467_2024_47052_MOESM3_ESM.pdf]

## **Description of Additional Supplementary Files**

**File name: Supplementary Data 1**

**Description:** Initial atomic configurations for MD simulation of the J71:Y6 blend.

**File name: Supplementary Data 2**

**Description:** Optimized atomic configurations for MD simulation of the J71:Y6 blend.

**File name: Supplementary Data 3**

**Description:** Initial atomic configurations for MD simulation of the P3HT:Y6 blend.

**File name: Supplementary Data 4**

**Description:** Optimized atomic configurations for MD simulation of the P3HT:Y6 blend.

**File name: Supplementary Data 5**

**Description:** Initial atomic configurations for MD simulation of the PTB7:Y6 blend.

**File name: Supplementary Data 6**

**Description:** Optimized atomic configurations for MD simulation of the PTB7:Y6 blend.
